# Supplementary material for: Oxidative coupling revisited: solvent-free, heterogeneous and in water
Source: Royal Society of Chemistry journal article supplement (doi:10.1039/b518132a), 2006-01-01
Supplement: esi.doc [file esi.doc]

# Supplementary Material (ESI) for Green Chemistry

# This journal is © The Royal Society of Chemistry 2006

Oxidative coupling of 2-naphthol

Method A: K-10 montmorillonite in toluene

Fe(III)-loaded K-10 montmorillonite (1.6370 g, 0.2638 mmol Fe) was added to a solution of 2-naphthol **6** (1.012 g, 7.020 mmol) in toluene (75 mL) and heated to reflux (111 °C) for 6 hours. After cooling, solids were removed by filtration and washed with a further aliquot of toluene. The organic solution was dried (MgSO4), filtered and the solvent removed to give a cream solid (0.7995 g, 79 % mass recovery). 1H NMR (CDCl3, TMS, 200 MHz) revealed 33 % 2-naphthol **6** and 67 % 1,1’-binaphthalene-2,2’-diol **12**.

2-Naphthol **6**: (lit1 m.p. 121-123 °C). IR (Nujol): 3209, 2957, 2924, 2866, 1686, 1678, 1631, 1602, 1514, 1467, 1407, 1379, 1364, 1326, 1289, 1278, 1242, 1217, 1173, 1150, 1140, 1118, 959, 906, 878, 854, 849, 844, 814, 753, 742, 729, 715, 622, 482 cm-1. 1H NMR (CDCl3) : 4.98, 1H, s, C(2)-OH; 7.07, 1H, dd, J 2.6 & 8.6Hz, C(3)-H; 7.15, 1H, d, J 2.6Hz, C(1)-H; 7.32, 1H, ddd, J 1.4 & 6.8 & 8.6Hz, C(6)-H; 7.42, 1H, ddd, J 1.4 & 6.8 & 8.6Hz, C(7)-H; 7.67, 1H, d, J 8.6Hz, C(8)-H; 7.75, 1H, d, J 8.6Hz, C(4)-H; 7.76, 1H, d, J 8.6Hz, C(5)-H. TLC (95:5 DCM/EtOAc, Rf = 0.68).

1,1’-Binaphthalene-2,2’-diol **12**: m.p. 214-216 °C (lit2 m.p. 214-216 °C). IR (Nujol): 3485, 3401, 2922, 2854, 1618, 1598, 1509, 1462, 1379, 1217, 1176, 1146, 1125, 827, 816, 751 cm-1. 1H NMR (CDCl3) : 5.01, 2H, s, C(2,2’)-OH; 7.15, 2H, d, J 8.9Hz, C(8,8’)-H; 7.31, 2H, t, J 5.7Hz, C(6,6’)-H; 7.38, 2H, t, J 5.7Hz, C(7,7’)-H; 7.42, 2H, d, J 8.8Hz, C(3,3’)-H; 7.85, 2H, d, J 8.8Hz, C(5,5’)-H; 7.99, 2H, d, J 8.8Hz, C(4,4’)-H. TLC (95:5 DCM/EtOAc, Rf = 0.58).

Method B: K-10 montmorillonite in water

2-Naphthol **1** (0.2047 g, 1.4200 mmol) was added to a suspension of Fe(III)-loaded K-10 montmorillonite (0.2923 g, 0.0471 mmol Fe) in water (35 mL) and stirred at reflux (100 °C) for 4 hours. The mixture was filtered, extracted with dichloromethane, dried (MgSO4), filtered and the solvent removed *in vacuo* to give a white solid (0.1793 g, 88 % mass recovery). 1H NMR (CDCl3, TMS, 300 MHz) revealed 96 % 2-naphthol **6** and 4 % 1,1’-binaphthalene-2,2’-diol **12**. 1H NMR spectral data was concordant with prior experiments.

Method C: K-10 montmorillonite, solvent-free 50 °C

2-Naphthol **6** (0.2008 g, 1.3930 mmol) and Fe(III)-loaded K-10 montmorillonite (0.3231 g, 0.0521 mmol Fe) were ground together in a mortar and pestle, placed in a sealed Pyrex test-tube in an aluminium dry block heater and kept at 50 °C for 24 hours. The organic component was extracted with dichloromethane, filtered to remove clay, washed with an aliquot of dichloromethane, dried (MgSO4), filtered and the solvent removed *in vacuo* to give a white solid (0.1931 g, 96 % mass recovery). 1H NMR (CDCl3, TMS, 300 MHz) revealed 93 % 2-naphthol **6** and 7 % 1,1’-binaphthalene-2,2’-diol **12**. 1H NMR spectral data was concordant with prior experiments.

Method D: K-10 montmorillonite, solvent-free 160 °C

2-Naphthol **6** (0.0324 g, 0.2247 mmol) and Fe(III)-loaded K-10 montmorillonite (0.0514 g, 0.0083 mmol Fe) were added together in a GC vial, sealed, and placed in an oven and kept at 160 °C for 24 hours. The organic component was extracted with dichloromethane, filtered to remove clay, washed with an aliquot of dichloromethane, dried (MgSO4), filtered and the solvent removed *in vacuo* to give a white solid (0.0331 g, 100 % mass recovery). GC analysis revealed 82 % 2-naphthol **6** and 18 % 1,1’-binaphthalene-2,2’-diol **12**.

Method E: Iron trichloride hexahydrate in water

2-Naphthol **6** (2.3723 g, 16.4550 mmol) was added to a solution of iron trichloride hexahydrate (8.8766 g, 32.8400 mmol) in distilled water (50 mL) and slurried at 50 °C for 4 hours. The solid organic phase was filtered off after cooling to give a white solid (2.3376 g, 99 % mass recovery). 1H NMR (CDCl3, TMS, 400MHz) revealed 0 % 2-naphthol **6** and 100 % 1,1’-binaphthalene-2,2’-diol **12**. 1H NMR spectral data was concordant with prior experiments.

Method F: Iron trichloride hexahydrate in acetonitrile

2-Naphthol **6** (0.2010 g, 1.3940 mmol) was added to a solution of iron trichloride hexahydrate (0.7531 g, 2.7860 mmol) in acetonitrile (30 mL) and stirred at reflux (82 °C) for 4 hours. The reaction was quenched with 1 M HCl, partitioned with an aliquot of dichloromethane, dried (MgSO4), filtered and the solvent removed *in vacuo* to give a white solid (0.1995 g, 99 % mass recovery). 1H NMR (CDCl3, TMS, 400 MHz) revealed 80 % 2-naphthol **6** 18 % 1,1’-binaphthalene-2,2’-diol **12**, and 2 % 1,4-naphthoquinone **18**. 1H NMR spectral data was concordant with prior experiments.

Method G: Iron trichloride hexahydrate, solvent-free

2-Naphthol **6** (1.0092 g, 6.999 mmol) and iron trichloride hexahydrate (3.7841 g, 13.990 mmol) were ground together in a mortar and pestle, placed in a sealed Pyrex test-tube in an aluminium dry block heater and kept at 50 °C for 2 hours. The reaction was quenched with 1 M HCl, washed with an aliquot of distilled water and the organic component extracted with dichloromethane. The solution was dried (MgSO4), filtered and the solvent removed *in vacuo* to give a white solid (0.9991 g, 99 % mass recovery). 1H NMR (CDCl3, TMS, 300 MHz) revealed 0 % 2-naphthol **6** and 100 % 1,1’-binaphthalene-2,2’-diol **12**. 1H NMR spectral data was concordant with prior experiments.

Method H: Iron trichloride hexahydrate in toluene

Iron trichloride hexahydrate (0.7484 g, 2.7690 mmol) was added to a solution of 2-naphthol **6** (0.1999 g, 1.3870 mmol) in toluene (30 mL) and slurried at 50 °C for 4 hours. The mixture was filtered and the solvent removed *in vacuo* to give a white solid (0.1770 g, 86 % mass recovery). 1H NMR (CDCl3, TMS, 200 MHz) revealed 0 % 2-naphthol **6** and 100 % 1,1’-binaphthalene-2,2’-diol **12**. 1H NMR spectral data was concordant with prior experiments.

Oxidative coupling of anthrone

Method A: K-10 montmorillonite in toluene

Fe(III)-loaded K-10 montmorillonite (0.2368 g, 0.0382 mmol Fe) was added to a solution of anthrone **7** (0.2002 g, 1.0310 mmol) in toluene (30 mL) at reflux (111 °C) for 6 hours. After cooling, solids were removed by filtration through celite and washed with a further aliquot of toluene. The organic solution was dried (MgSO4), filtered and the solvent removed *in vacuo* to give a yellow solid (0.1883 g, 94 % mass recovery). 1H NMR (CDCl3, TMS, 300 MHz) revealed 21 % anthrone **7**, 1 % anthraquinone **19** and 78 % bianthronyl **13**.

Anthrone **7**: (lit3 m.p. 154-155 °C). IR (Nujol): 2966, 2925, 2855, 1669, 1606, 1600, 1587, 1466, 1402, 1378, 1366, 1347, 1324, 1312, 1173, 1154, 1113, 1089, 1037, 1031, 968, 933, 868, 863, 818, 812, 725, 713, 666, 631, 576, 571 cm-1. 1H NMR (CDCl3) : 4.29, 2H, s, C(10)-H; 7.38-7.46, 4H, m, C(2,4,5,7)-H; 7.46-7.65, 2H, m, C(3,6)-H; 8.32-8.43, 2H, m, C(1,8)-H. TLC (95:5 DCM/EtOAc, Rf = 0.68).

Anthraquinone **19**: m.p. 282-283 °C (lit4 m.p. 283-285 °C). IR (Nujol): 2964, 2925, 2856, 2724, 1704, 1678, 1633, 1592, 1580, 1574, 1461, 1377, 1368, 1333, 1323, 1306, 1287, 1207, 1171, 1153, 1099, 1087, 969, 943, 937, 913, 894, 820, 810, 721, 694, 622, 577, 461 cm-1. 1H NMR (CDCl3) : 7.81, 4H, dd, J 3.33 & 5.80Hz, C(2,3,6,7)-H; 8.32, 4H, dd, J 3.33 & 5.80Hz, C(1,4,5,8)-H. TLC (95:5 DCM/EtOAc, Rf = 0.86).

Bianthronyl **13**: m.p. 255-256 °C (lit5 254-258 °C) IR (Nujol): 3061, 2964, 2924, 2866, 1662, 1604, 1598, 1587, 1572, 1464, 1378, 1366, 1361, 1320, 1307, 1261, 1178, 1172, 1167, 1166, 1096, 966, 936, 818, 789, 746, 739, 721, 709, 701, 693, 682, 634, 623, 673 cm-1. 1H NMR (CDCl3) : 4.78, 2H, s, C(9,9’)-H; 6.84-6.87, 4H, m, C(1,1’,8,8’)-H; 7.37-7.44, 8H, m, C(2,2’,3,3’,6,6’,7,7’)-H; 7.91-7.96, 4H, m, C(4,4’,5,5’)-H. TLC (95:5 DCM/EtOAc, Rf = 0.50).

Method B: K-10 montmorillonite in water

Anthrone **7** (0.1980 g, 1.0190 mmol) was added to a suspension of Fe(III)-loaded K-10 montmorillonite (0.2345 g, 0.0378 mmol Fe) in water (30 mL) and stirred at reflux (100 °C) for 6 hours. The mixture was filtered, extracted with dichloromethane, dried (MgSO4), filtered and the solvent removed *in vacuo* to give a yellow solid (0.1807 g, 91 % mass recovery). 1H NMR (CDCl3, TMS, 300 MHz) revealed 65 % anthrone **7**, 3 % anthraquinone **19** and 32 % bianthronyl **13**. 1H NMR spectral data was concordant with prior experiments.

Method C: K-10 montmorillonite, solvent-free 50 °C

Anthrone **7** (0.2054 g, 1.0580 mmol) and Fe(III)-loaded K-10 montmorillonite (0.1168 g, 0.0188 mmol Fe) were ground together in a mortar and pestle, placed in a sealed Pyrex test-tube in an aluminium dry block heater and kept at 50 °C for 23½ hours. The organic component was extracted with chloroform, filtered to remove clay, washed with an aliquot of chloroform, dried (MgSO4), filtered and the solvent removed *in vacuo* to give a yellow solid (0.1846 g, 90 % mass recovery). 1H NMR (CDCl3, TMS, 200 MHz) revealed 82 % anthrone **7**, 14 % anthraquinone **19** and 4 % bianthronyl **13**. 1H NMR spectral data was concordant with prior experiments.

Method D: K-10 montmorillonite, solvent-free 160 °C

Anthrone 7 (0.0426 g, 0.2193 mmol) and Fe(III)-loaded K-10 montmorillonite (0.0504 g, 0.0081 mmol Fe) were added together in a GC vial, sealed, and placed in an oven and kept at 160 °C for 24 hours. The organic component was extracted with dichloromethane, filtered to remove clay, washed with an aliquot of dichloromethane, dried (MgSO4), filtered and the solvent removed *in vacuo* to give a yellow solid (0.0350 g, 82 % mass recovery). GC analysis revealed 58 % anthrone **7**, 40 % anthraquinone **19** and 2 % bianthronyl **13**.

Method E: Iron trichloride hexahydrate in water

Anthrone **7** (0.1971 g, 1.0150 mmol) was added to a solution of iron trichloride hexahydrate (0.5564 g, 2.0590 mmol) in distilled water (30 mL) and slurried at 50 °C for 4 hours. The organic component was extracted with dichloromethane, dried (MgSO4), filtered and the solvent removed *in vacuo* to give a yellow solid (0.1718 g, 87 % mass recovery). 1H NMR (CDCl3, TMS, 200 MHz) revealed 88 % anthrone **7**, 9 % anthraquinone **19** and 3 % bianthronyl **13**. 1H NMR spectral data was concordant with prior experiments.

Method F: Iron trichloride hexahydrate in acetonitrile

Anthrone **7** (0.2092 g, 1.0770 mmol) was added to a solution of iron trichloride hexahydrate (0.5538 g, 2.0490 mmol) in acetonitrile (30 mL) and stirred at reflux (82 °C) for 4 hours. The reaction was quenched with 1 M HCl, partitioned with an aliquot of dichloromethane, dried (MgSO4), filtered and the solvent removed *in vacuo* to give a yellow solid (0.1630 g, 78 % mass recovery). 1H NMR (CDCl3, TMS, 200 MHz) revealed 27 % anthrone **7**, 9 % anthraquinone **19** and 64 % bianthronyl **13**. 1H NMR spectral data was concordant with prior experiments.

Method G: Iron trichloride hexahydrate, solvent-free

Anthrone **7** (1.3596 g, 6.9990 mmol) and iron trichloride hexahydrate (3.78 g, 14.0 mmol) were ground together in a mortar and pestle, placed in a sealed RBF and kept at 50 °C for 2 hours. The reaction was quenched with 1 M HCl, washed with an aliquot of distilled water and the organic component extracted with chloroform. The solution was dried (MgSO4), filtered and the solvent removed *in vacuo* to give a yellow solid (1.0877 g, 80 % mass recovery). 1H NMR (CDCl3, TMS, 200 MHz) revealed 7 % anthrone **7**, 63 % anthraquinone **19** and 30 % bianthronyl **13**. 1H NMR spectral data was concordant with prior experiments.

Method H: Iron trichloride hexahydrate in toluene

Iron trichloride hexahydrate (0.1158 g, 0.4280 mmol) was added to a solution of anthrone **7** (0.0402 g, 0.2070 mmol) in toluene (4.5 mL) and slurried at 50 °C for 4 hours. The mixture was filtered and the solvent removed *in vacuo* to give a yellow solid (0.0328 g, 82 % mass recovery). 1H NMR (CDCl3, TMS, 400 MHz) revealed 0 % anthrone **7**, 11 % anthraquinone **19** and 89 % bianthronyl **13**. 1H NMR spectral data was concordant with prior experiments.

Oxidative coupling of vanillin

Method A: K-10 montmorillonite in toluene

Fe(III)-loaded K-10 montmorillonite (0.1042 g, 0.0168 mmol Fe) was added to a solution of vanillin **8** (0.2033 g, 1.3360 mmol) in toluene (30 mL) at reflux (111 °C) for 6 hours. Solids were removed by filtration and washed with a further aliquot of toluene. The organic solution was dried (MgSO4), filtered and the solvent removed *in vacuo* to give a white solid (0.1945 g, 96 % mass recovery). A sample of the weighed dry clay was extracted with DMSO-D6, and 1H NMR (DMSO-D6, TMS, 300 MHz) revealed no divanillin **14** was present. 1H NMR (CDCl3, TMS, 300 MHz) revealed 100 % vanillin **8**.

Vanillin **8**: m.p. 81-83 °C (lit6 m.p. 82-83 °C). IR (Nujol): 3174, 3019, 2956, 2926, 2855, 2736, 2112, 1984, 1716, 1693, 1666, 1588, 1511, 1486, 1466, 1431, 1397, 1374, 1301, 1266, 1201, 1172, 1155, 1125, 1030, 960, 860, 828, 813, 734, 633, 591, 554 cm-1. 1H NMR (CDCl3) : 3.97, 3H, s, C(8)-H; 6.22, 1H, s, C(4)-OH; 7.04, 1H, d, J 8.48Hz, C(5)-H; 7.42, 1H, d, J 1.78Hz, C(2)-H; 7.42, 1H, dd, J 1.78Hz & 8.48Hz, C(6)-H; 9.83, 1H, s, C(7)-H.

Divanillin **14**: m.p. 314-315 °C (lit7 m.p. 300-325 °C). IR (KBr): 3286, 1673, 1588, 1508, 1458, 1422, 1400, 1356, 1312, 1258, 1182, 1149, 1081, 1044, 920, 883, 847, 743, 718, 665, 633, 604, 588 cm-1. 1H NMR (DMSO-D6) : 3.93, 6H, s, C(8,8’)-H; 7.43, 4H, s, C(2,2’,4,4’)-H; 9.82, 2H, s, C(7,7’)-H.

Method B: K-10 montmorillonite in water

Vanillin **8** (0.2064 g, 1.3570 mmol) was added to a suspension of Fe(III)-loaded K-10 montmorillonite (0.3090 g, 0.0498 mmol Fe) in water (30 mL) and stirred at reflux (100 °C) for 6 hours. The mixture was filtered, extracted with dichloromethane, dried (MgSO4), filtered and the solvent removed *in vacuo* to give a white solid (0.1847 g, 90 % mass recovery). A sample of the weighed dry clay was extracted with DMSO-D6, and 1H NMR (DMSO-D6, naphthalene internal standard, TMS, 300 MHz) revealed no divanillin **14** was present. 1H NMR (CDCl3, TMS, 300 MHz) revealed 100 % vanillin **8**. 1H NMR spectral data was concordant with prior experiments.

Method C: K-10 montmorillonite, solvent-free 50 °C

Vanillin **8** (0.2082 g, 1.3680 mmol) and Fe(III)-loaded K-10 montmorillonite (0.1128 g, 0.0182 mmol Fe) were ground together in a mortar and pestle, placed in a sealed Pyrex test-tube in an aluminium dry block heater and kept at 50 °C for 30 hours. The organic component was extracted with chloroform, filtered to remove clay, washed with an aliquot of chloroform, dried (MgSO4), filtered and the solvent removed *in vacuo* to give a white solid (0.2149 g, 100 % mass recovery). 1H NMR (CDCl3, TMS, 200 MHz) revealed 100 % vanillin **8**. No divanillin **14** was isolated during workup. 1H NMR spectral data was concordant with prior experiments.

Method D: K-10 montmorillonite, solvent-free 160 °C

Vanillin **8** (0.0334 g, 0.2195 mmol) and Fe(III)-loaded K-10 montmorillonite (0.0506 g, 0.0109 mmol Fe) were added together in a GC vial, sealed, and placed in an oven and kept at 160 °C for 24 hours. The organic component was extracted with DMSO, filtered to remove clay, washed with an aliquot of DMSO and made up to 10 ml volumetrically. Mass recovery was determined using a GC calibration curve for vanillin and divanillin (0.0235 g, 70 % mass recovery). GC analysis revealed 72 % vanillin **8** and 28 % divanillin **14**.

Method E: Iron trichloride hexahydrate in water

Vanillin **8** (0.1991 g, 1.3090 mmol) was added to a solution of iron trichloride hexahydrate (0.7150 g, 2.6450 mmol) in distilled water (30 mL) and slurried at 50 °C for 4 hours. The insoluble product was filtered off, to yield a grey solid (0.0688 g, 35 % mass recovery) and the remaining organic component was extracted with dichloromethane, dried (MgSO4), filtered and the solvent removed *in vacuo* to give a white solid (0.0654 g, 33 % mass recovery, 68 % total mass recovery). 1H NMR (CDCl3, TMS, 400 MHz) of the white solid and 1H NMR (DMSO-D6, TMS, 300 MHz) of the grey solid revealed overall 43 % vanillin **8** and 57 % divanillin **14** respectively. 1H NMR spectral data was concordant with prior experiments.

Method F: Iron trichloride hexahydrate in acetonitrile

Vanillin **8** (0.2026 g, 1.3320 mmol) was added to a solution of iron trichloride hexahydrate (0.7156 g, 2.6480 mmol) in acetonitrile (30 mL) and stirred at reflux (82 °C) for 4 hours. The reaction was quenched with 1 M HCl, partitioned with an aliquot of dichloromethane and the remaining grey solid was filtered off (0.0036 g, 2 % mass recovery). The organic phase was dried (MgSO4), filtered and the solvent removed *in vacuo* to give a white solid (0.1272 g, 63 % mass recovery, 65 % total mass recovery). 1H NMR (CDCl3, TMS, 400 MHz) of the white solid and 1H NMR (DMSO-D6, TMS, 400 MHz) of the grey solid revealed overall 97 % vanillin **8** and 3 % divanillin **14** respectively. 1H NMR spectral data was concordant with prior experiments.

Method G: Iron trichloride hexahydrate, solvent-free

Vanillin **8** (0.1010 g, 0.6640 mmol) and iron trichloride hexahydrate (0.3516 g, 1.3010 mmol) were ground together in a mortar and pestle, placed in a sealed vial and kept at 85 °C for 2 hours. A distinct phase-change was observed at the boundary between the reagents. The reaction was quenched with 1 M HCl, washed with an aliquot of distilled water and the organic component extracted with dichloromethane. The solution was dried (MgSO4), filtered and the solvent removed *in vacuo* to give a white solid (0.0999 g, 99 % mass recovery). 1H NMR (CDCl3, TMS, 300 MHz) revealed 100 % vanillin **8**. No divanillin **14** was isolated during workup. 1H NMR spectral data was concordant with prior experiments.

Method H: Iron trichloride hexahydrate in toluene

Iron trichloride hexahydrate (0.1122 g, 0.4151 mmol) was added to a solution of vanillin **8** (0.0317 g, 0.2084 mmol) in toluene (4.5 mL) and slurried at 50 °C for 4 hours. The mixture was filtered and the solvent removed *in vacuo* to give a white solid (0.0300 g, 95 % mass recovery). 1H NMR (CDCl3, TMS, 300 MHz) revealed 100 % vanillin **8**. No divanillin **14** was isolated during workup. 1H NMR spectral data was concordant with prior experiments.

Oxidative coupling of 2,6-dimethylphenol

Method A: K-10 montmorillonite in toluene

Fe(III)-loaded K-10 montmorillonite (0.7608 g, 0.1226 mmol Fe) was added to a solution of 2,6-dimethylphenol **9** (0.2047 g, 1.6760 mmol) in toluene (30 mL) at reflux (111 °C) for 6 hours. After cooling, solids were removed by filtration and washed with a further aliquot of toluene. The organic solution was dried (MgSO4), filtered and the solvent removed *in vacuo* to give a red solid (0.1750 g, 86 % mass recovery). 1H NMR (CDCl3, TMS, 300 MHz) revealed 100 % 2,6-dimethylphenol **9**, 0 % 3,3’,5,5’-tetramethyldiphenoquinone **21**, 0 % 2,6-dimethylbenzoquinone **20** and 0 % 3,3’,5,5’-tetramethyl-1,1’-biphenyl-4,4’-diol **15**.

2,6-Dimethylphenol **9**: (lit8 m.p. 47-49 °C). IR (KBr): 3413, 3047, 3032, 2974, 2945, 2918, 2866, 1616, 1594, 1478, 1446, 1428, 1379, 1336, 1286, 1265, 1238, 1216, 1197, 1161, 1098, 1089, 1031, 1003, 989, 961, 914, 826, 767, 728, 671, 667, 486, 469, 467 cm-1. 1H NMR (CDCl3) : 2.23, 2H, s, C(7,8)-H; 4.64, 1H, s, C(1)-OH; 6.75, 1H, t, J 7.45Hz, C(4)-H; 6.96, 2H, d, J 7.45Hz, C(3,5)-H. TLC (95:5 DCM/EtOAc, Rf = 0.61).

3,3’,5,5’-Tetramethyldiphenoquinone **21**: m.p. 208-209 °C (lit9 m.p. 205-207 °C). IR (KBr): 1637, 1591, 1560, 1370, 1353, 1279, 1217, 1047, 939, 913, 828, 775, 599, 474, 420 cm-1. 1H NMR (CDCl3) : 2.06, 12H, s, C(7,7’,8,8’)-H; 8.14, 4H, s, C(2,2’,6,6’)-H. TLC (95:5 DCM/EtOAc, Rf = 0.50).

2,6-Dimethyl-p-benzoquinone **20**: m.p. 68-69 °C (lit9 m.p. 69-70 °C). IR (KBr): 3264, 3052, 3042, 2996, 2968, 2930, 1763, 1673, 1656, 1627, 1614, 1442, 1430, 1422, 1383, 1375, 1362, 1317, 1291, 1206, 1181, 1036, 1024, 936, 920, 901, 859, 794, 648, 569, 467, 464 cm-1. 1H NMR (CDCl3) : 2.29, 6H, s, C(7,8)-H; 7.14, 2H, s, C(3,5)-H. TLC (95:5 DCM/EtOAc, Rf = 0.61).

3,3’,5,5’-Tetramethyl-1,1’-biphenyl-4,4’-diol **15**: m.p. 178-179 °C (lit10 m.p. 173-174 °C). 1H NMR (CDCl3) : 2.06, s, 12H, C(7,7’,8,8’)-H; 6.55, s, 4H, C(2,2’,6,6’)-H. TLC (95:5 DCM/EtOAc, Rf = 0.67).

Method B: K-10 montmorillonite in water

2,6-Dimethylphenol **9** (0.2028 g, 1.6600 mmol) was added to a suspension of Fe(III)-loaded K-10 montmorillonite (0.7637 g, 0.1231 mmol Fe) in water (30 mL) and stirred at reflux (100 °C) for 6 hours. The mixture was filtered, extracted with dichloromethane, dried (MgSO4), filtered and the solvent removed *in vacuo* to give a red solid (0.0487 g, 24 % mass recovery). 1H NMR (CDCl3, TMS, 400 MHz) revealed 0 % 2,6-dimethylphenol **9**, 29 % 3,3’,5,5’-tetramethyldiphenoquinone **21**, 71 % 2,6-dimethylbenzoquinone **20** and 0 % 3,3’,5,5’-tetramethyl-1,1’-biphenyl-4,4’-diol **15**. 1H NMR spectral data was concordant with prior experiments.

Method C: K-10 montmorillonite, solvent-free 50 °C

2,6-Dimethylphenol **9** (0.1982 g, 1.6220 mmol) and Fe(III)-loaded K-10 montmorillonite (0.1092 g, 0.0176 mmol Fe) were ground together in a mortar and pestle, placed in a sealed Pyrex test-tube in an aluminium dry block heater and kept at 50 °C for 24 hours. The organic component was extracted with dichloromethane, filtered to remove clay, washed with an aliquot of dichloromethane, dried (MgSO4), filtered and the solvent removed *in vacuo* to give a white solid (0.2276 g, 99 % mass recovery). 1H NMR (CDCl3, TMS, 200 MHz) revealed 100 % 2,6-dimethylphenol **9**, 0 % 3,3’,5,5’-tetramethyldiphenoquinone **21**, 0 % 2,6-dimethylbenzoquinone **20** and 0 % 3,3’,5,5’-tetramethyl-1,1’-biphenyl-4,4’-diol **15**. 1H NMR spectral data was concordant with prior experiments.

Method D: K-10 montmorillonite, solvent-free 160 °C

2,6-Dimethylphenol **9** (0.0261 g, 0.2136 mmol) and Fe(III)-loaded K-10 montmorillonite (0.0508 g, 0.0082 mmol Fe) were added together in a GC vial, sealed, and placed in an oven and kept at 160 °C for 24 hours. The organic component was extracted with dichloromethane, filtered to remove clay, washed with an aliquot of dichloromethane, dried (MgSO4), filtered and the solvent removed *in vacuo* to give a red oil (0.0035 g, 13 % mass recovery). GC analysis revealed 10 % 2,6-dimethylphenol **9**, 54 % 3,3’,5,5’-tetramethyldiphenoquinone **21**, 0 % 2,6-dimethylbenzoquinone **20** and 36 % 3,3’,5,5’-tetramethyl-1,1’-biphenyl-4,4’-diol **15**.

Method E: Iron trichloride hexahydrate in water

2,6-Dimethylphenol **9** (0.2024 g, 1.6570 mmol) was added to a solution of iron trichloride hexahydrate (1.7695 g, 6.5470 mmol) in distilled water (30 mL) and slurried at 50 °C for 4 hours. The solid organic phase was filtered off after cooling, and the remaining mixture was extracted with dichloromethane, dried (MgSO4), filtered, combined and the solvent removed *in vacuo* to give a red solid (0.1801 g, 89 % mass recovery). 1H NMR (CDCl3, TMS, 300 MHz) revealed 12 % 2,6-dimethylphenol **9**, 68 % 3,3’,5,5’-tetramethyldiphenoquinone **21**, 1 % 2,6-dimethylbenzoquinone **20** and 19 % 3,3’,5,5’-tetramethyl-1,1’-biphenyl-4,4’-diol **15**. 1H NMR spectral data was concordant with prior experiments.

Method F: Iron trichloride hexahydrate in acetonitrile

2,6-Dimethylphenol **9** (0.2035 g, 1.6660 mmol) was added to a solution of iron trichloride hexahydrate (1.7748 g, 6.5660 mmol) in acetonitrile (30 mL) and stirred at reflux (82 °C) for 4 hours. The reaction was quenched with 1 M HCl, partitioned with an aliquot of chloroform, dried (MgSO4), filtered and the solvent removed *in vacuo* to give a yellow solid (0.1725 g, 85 % mass recovery). 1H NMR (CDCl3, TMS, 400 MHz) revealed 57 % 2,6-dimethylphenol **9**, 6 % 3,3’,5,5’-tetramethyldiphenoquinone **21**, 27 % 2,6-dimethylbenzoquinone **20** and 10 % 3,3’,5,5’-tetramethyl-1,1’-biphenyl-4,4’-diol **15**. 1H NMR spectral data was concordant with prior experiments.

Method G: Iron trichloride hexahydrate, solvent-free

2,6-Dimethylphenol **9** (0.0982 g, 0.8040 mmol) and iron trichloride hexahydrate (0.8612 g, 3.1860 mmol) were ground together in a mortar and pestle, placed in a sealed vial and kept at 85 °C for 2 hours (50 °C for 2 hours yielded the same overall result). The reaction was quenched with 1 M HCl, washed with an aliquot of distilled water and the organic component extracted with dichloromethane. The solution was dried (MgSO4), filtered and the solvent removed *in vacuo* to give a red solid (0.0864 g, 88 % mass recovery). 1H NMR (CDCl3, TMS, 300 MHz) revealed 100 % 2,6-dimethylphenol **9**, 0 % 3,3’,5,5’-tetramethyldiphenoquinone **21**, 0 % 2,6-dimethylbenzoquinone **20** and 0 % 3,3’,5,5’-tetramethyl-1,1’-biphenyl-4,4’-diol **15**. 1H NMR spectral data was concordant with prior experiments.

Method H: Iron trichloride hexahydrate in toluene

Iron trichloride hexahydrate (0.1125 g, 0.4160 mmol) was added to a solution of 2,6-dimethylphenol **9** (0.0258 g, 0.2110 mmol) in toluene (4.5 mL) and slurried at 50 °C for 4 hours. The mixture was filtered and the solvent removed *in vacuo* to give a red solid (0.0064 g, 25 % mass recovery). 1H NMR (CDCl3, TMS, 400 MHz) revealed 55 % 2,6-dimethylphenol **9**, 11 % 3,3’,5,5’-tetramethyldiphenoquinone **21**, 30 % 2,6-dimethylbenzoquinone **20** and 4 % 3,3’,5,5’-tetramethyl-1,1’-biphenyl-4,4’-diol **15**. 1H NMR spectral data was concordant with prior experiments.

Oxidative coupling of 2,4-dimethylphenol

Method A: K-10 montmorillonite in toluene

Fe(III)-loaded K-10 montmorillonite (0.3842 g, 0.0619 mmol Fe) was added to a solution of 2,4-dimethylphenol **10** (0.2000 g, 1.6370 mmol) in toluene (30 mL) at reflux (111 °C) for 6 hours. After cooling, solids were removed by filtration and washed with a further aliquot of toluene. The organic solution was dried (MgSO4), filtered and the solvent removed *in vacuo* to give red oil (0.1623 g, 81 % mass recovery). 1H NMR (CDCl3, TMS, 300 MHz) revealed 85 % 2,4-dimethylphenol **10** and 15 % 3,3’,5,5’-tetramethyl-1,1’-biphenyl-2,2’-diol **16**.

2,4-Dimethylphenol **10**: IR (Liquid film): 3403, 3393, 3018, 2947, 2923, 2863, 2736, 2632, 1868, 1615, 1596, 1512, 1463, 1416, 1379, 1351, 1337, 1328, 1265, 1205, 1161, 1120, 1037, 1013, 997, 984, 930, 876, 810, 768, 718, 666, 499, 491, 449 cm-1. 1H NMR (CDCl3) : 2.20, 3H, s, C(7)-H; 2.24, 3H, s, C(8)-H; 4.56, 1H, s, C(1)-H; 6.64, 1H, d, J 8.00Hz, C(3)-H; 6.85, 1H, d, J 8.00Hz, C(5)-H; 6.91, 1H, s, C(6)-H. TLC (70:30 Et2O/Hexane, Rf = 0.62).

3,3’,5,5’-Tetramethyl-1,1’-biphenyl-2,2’-diol **16**: m.p. 138-139 °C (lit11 m.p. 137-138 °C). IR (KBr): 3448, 2922, 1654, 1610, 1599, 1570, 1560, 1542, 1508, 1499, 1477, 1458, 1438, 1381, 1209, 1155, 1120, 862, 420 cm-1. 1H NMR (CDCl3) : 2.27, 12H, s, C(7,7’,8,8’)-H; 5.07, 2H, s, C(6,6’)-OH; 6.86, 2H, m, C(2,2’)-H; 6.99, 2H, m, C(4,4’)-H. TLC (70:30 Et2O/Hexane, Rf = 0.44).

Method B: K-10 montmorillonite in water

2,4-Dimethylphenol **10** (0.2168 g, 1.7750 mmol) was added to a suspension of Fe(III)-loaded K-10 montmorillonite (0.3803 g, 0.0613 mmol Fe) in water (30 mL) and stirred at reflux (100 °C) for 6 hours. The mixture was filtered, extracted with dichloromethane, dried (MgSO4), filtered and the solvent removed *in vacuo* to give red oil (0.0370 g, 17 % mass recovery). 1H NMR (CDCl3, TMS, 400 MHz) revealed 36 % 2,4-dimethylphenol **10** and 64 % 3,3’,5,5’-tetramethyl-1,1’-biphenyl-2,2’-diol **16**. 1H NMR spectral data was concordant with prior experiments.

Method C: K-10 montmorillonite, solvent-free 50 °C

2,4-Dimethylphenol **10** (0.2000 g, 1.6370 mmol) and Fe(III)-loaded K-10 montmorillonite (0.1082 g, 0.0174 mmol Fe) were gently mixed together in a Pyrex test-tube, which was sealed and placed in an aluminium dry block heater and kept at 50 °C for 24 hours. The organic component was extracted with dichloromethane, filtered to remove clay, washed with an aliquot of dichloromethane, dried (MgSO4), filtered and the solvent removed *in vacuo* to give clear oil (0.2002 g, 100 % mass recovery). 1H NMR (CDCl3, TMS, 200 MHz) revealed 100 % 2,4-dimethylphenol **10** and 0 % 3,3’,5,5’-tetramethyl-1,1’-biphenyl-2,2’-diol **16**. 1H NMR spectral data was concordant with prior experiments.

Method D: K-10 montmorillonite, solvent-free 160 °C

2,4-Dimethylphenol **10** (0.0251 g, 0.2055 mmol) and Fe(III)-loaded K-10 montmorillonite (0.0513 g, 0.0083 mmol Fe) were added together in a GC vial, sealed, and placed in an oven and kept at 160 °C for 24 hours. The organic component was extracted with dichloromethane, filtered to remove clay, washed with an aliquot of dichloromethane, dried (MgSO4), filtered and the solvent removed *in vacuo* to give a red oil (0.0024 g, 10 % mass recovery). GC analysis revealed 98 % 2,4-dimethylphenol **10** and 2 % 3,3’,5,5’-tetramethyl-1,1’-biphenyl-2,2’-diol **16.**

Method E: Iron trichloride hexahydrate in water

2,4-Dimethylphenol **10** (0.2000 g, 1.6370 mmol) was added to a solution of iron trichloride hexahydrate (0.8885 g, 3.2870 mmol) in distilled water (40 mL) and slurried at 50 °C for 3½ hours. The organic component was extracted with dichloromethane, dried (MgSO4), filtered and the solvent removed *in vacuo* to give an oily red solid (0.1500 g, 75 % mass recovery). 1H NMR (CDCl3, TMS, 300 MHz) revealed 25 % 2,4-dimethylphenol **10** and 75 % 3,3’,5,5’-tetramethyl-1,1’-biphenyl-2,2’-diol **16**. 1H NMR spectral data was concordant with prior experiments.

Method F: Iron trichloride hexahydrate in acetonitrile

2,4-Dimethylphenol **10** (0.2000 g, 1.6370 mmol) was added to a solution of iron trichloride hexahydrate (0.8874 g, 3.2830 mmol) in acetonitrile (30 mL) and stirred at reflux (82 °C) with nitrogen bubbling for 5½ hours. The reaction was quenched with 1 M HCl, partitioned with an aliquot of chloroform, dried (MgSO4), filtered and the solvent removed *in vacuo* to give a clear oil (0.2046 g, 100 % mass recovery). 1H NMR (CDCl3, TMS, 300 MHz) revealed 100 % 2,4-dimethylphenol **10** and 0 % 3,3’,5,5’-tetramethyl-1,1’-biphenyl-2,2’-diol **16**. 1H NMR spectral data was concordant with prior experiments.

Method G: Iron trichloride hexahydrate, solvent-free

2,4-Dimethylphenol **10** (0.2000 g, 1.6370 mmol) and iron trichloride hexahydrate (0.8825 g, 3.2650 mmol) were ground together in a mortar and pestle, placed in a sealed test-tube and kept at 50 °C for 2 hours. The reaction was quenched with 1 M HCl, washed with an aliquot of distilled water and the organic component extracted with dichloromethane. The solution was dried (MgSO4), filtered and the solvent removed *in vacuo* to give a red solid (0.1835 g, 92 % mass recovery). 1H NMR (CDCl3, TMS, 200 MHz) revealed 31 % 2,4-dimethylphenol **10** and 69 % 3,3’,5,5’-tetramethyl-1,1’-biphenyl-2,2’-diol **16**. 1H NMR spectral data was concordant with prior experiments.

Method H: Iron trichloride hexahydrate in toluene

Iron trichloride hexahydrate (0.1153 g, 0.4270 mmol) was added to a solution of 2,4-dimethylphenol **10** (0.0255 g, 0.2090 mmol) in toluene (4.5 mL) and slurried at 50 °C for 4 hours. The mixture was filtered and the solvent removed *in vacuo* to give yellow oil (0.0161 g, 63 % mass recovery). 1H NMR (CDCl3, TMS, 400 MHz) revealed 92 % 2,4-dimethylphenol **10** and 8 % 3,3’,5,5’-tetramethyl-1,1’-biphenyl-2,2’-diol **16**. 1H NMR spectral data was concordant with prior experiments.

Oxidative coupling of 6-hydroxy-2-naphthalene-sulfonic acid sodium salt

Method A: K-10 montmorillonite in toluene

Fe(III)-loaded K-10 montmorillonite (0.1876 g, 0.0302 mmol Fe) was added to a suspension of 6-hydroxy-2-naphthalene-sulfonic acid sodium salt **11** (0.1988 g, 0.8070 mmol) in toluene (30 mL) and stirred at reflux (111 °C) for 6 hours. After cooling, solids were filtered dry and organic material extracted with distilled water, and the solvent removed *in vacuo* to give a brown solid (0.1982 g, 100 % mass recovery). 1H NMR (DMSO-D6, TMS, 400 MHz) revealed 100 % 6-Hydroxy-2-naphthalene-sulfonic acid sodium salt **11**, and 0 % 6,6’-dihydroxy-1,1’-binaphthalenyl-2,2’-disulfonic acid disodium salt **17**.

6-Hydroxy-2-naphthalene-sulfonic acid sodium salt **11**: m.p. >350 °C. IR (KBr): 3448, 1654, 1626, 1602, 1578, 1560, 1542, 1508, 1474, 1439, 1390, 1354, 1270, 1237, 1189, 1136, 1107, 1041, 963, 922, 903, 870, 818, 750, 679, 662, 628, 586, 566, 530, 501, 478, 421 cm-1. 1H NMR (DMSO-D6) : 7.06, 1H, s, C(1)-H; 7.10, 1H, s, C(3)-H; 7.60, 1H, s, C(4)-H; 7.76, 1H, s, C(8)-H; 7.80, 1H, s, C(7)-H; 8.00, 1H, s, C(5)-H; 9.71, 1H, s, C(6)-OH. TLC (70:30 EtOH/Et2O, Rf = 0.77).

6,6’-Dihydroxy-1,1’-binaphthalenyl-2,2’-disulfonic acid disodium salt **17**: m.p. >350 °C. IR (KBr): 3423, 1618, 1560, 1548, 1524, 1503, 1498, 1466, 1420, 1384, 1341, 1175, 1100, 1035, 937, 675, 418 cm-1. 1H NMR (D2O) : 6.67, 2H, m, C(3,3’)-H; 7.01, 4H, m, C(3,3’,8,8’)-H; 7.64, 2H, m, C(7,7’)-H; 7.86, 2H, m, C(5,5’)-H. TLC (70:30 EtOH/Et2O, Rf = 0.61).

Method B: K-10 montmorillonite in water

6-Hydroxy-2-naphthalene-sulfonic acid sodium salt **11** (0.1992 g, 0.8090 mmol) was added to a suspension of Fe(III)-loaded K-10 montmorillonite (0.1890 g, 0.0305 mmol Fe) in water (30 mL) and stirred at reflux (100 °C) for 6 hours. The solid were filtered off, washed with an aliquot of distilled water, and solvent removed *in vacuo* to give a brown solid (0.1932 g, 97 % mass recovery). 1H NMR (DMSO-D6, TMS, 200 MHz) revealed 100 % 6-Hydroxy-2-naphthalene-sulfonic acid sodium salt **11**, and 0 % 6,6’-dihydroxy-1,1’-binaphthalenyl-2,2’-disulfonic acid disodium salt **17**. 1H NMR spectral data was concordant with prior experiments.

Method C: K-10 montmorillonite, solvent-free 50 °C

6-Hydroxy-2-naphthalene-sulfonic acid sodium salt **11** (0.2017 g, 0.8190 mmol) and Fe(III)-loaded K-10 montmorillonite (0.1090 g, 0.0176 mmol Fe) were ground together in a Pyrex test-tube, which was sealed and placed in an aluminium dry block heater and kept at 50 °C for 24 hours. The organic component was extracted with water, filtered to remove clay, washed with an aliquot of water and the solvent removed *in vacuo* to give a brown solid (0.1963 g, 97 % mass recovery). 1H NMR (DMSO-D6, TMS, 200 MHz) revealed 100 % 6-Hydroxy-2-naphthalene-sulfonic acid sodium salt **11**, and 0 % 6,6’-dihydroxy-1,1’-binaphthalenyl-2,2’-disulfonic acid disodium salt **17**. 1H NMR spectral data was concordant with prior experiments.

Method D: K-10 montmorillonite, solvent-free 160 °C

6-Hydroxy-2-naphthalene-sulfonic acid sodium salt **11** (0.0531 g, 0.2157 mmol) and Fe(III)-loaded K-10 montmorillonite (0.0509 g, 0.0082 mmol Fe) were added together in a GC vial, sealed, and placed in an oven and kept at 160 °C for 24 hours. The organic component was extracted with D2O, filtered to remove clay, washed with an aliquot of D2O and solvent removed *in vacuo* after 1H NMR to give a brown solid (0.0529 g, 100 % mass recovery). 1H NMR (D2O, TMS, 200 MHz) revealed 100 % 6-Hydroxy-2-naphthalene-sulfonic acid sodium salt **11**, and 0 % 6,6’-dihydroxy-1,1’-binaphthalenyl-2,2’-disulfonic acid disodium salt **17**. 1H NMR spectral data was concordant with prior experiments.

Method E: Iron trichloride hexahydrate in water

6-Hydroxy-2-naphthalene-sulfonic acid sodium salt **11** (0.2070 g, 0.8410 mmol) was added to a solution of iron trichloride hexahydrate (0.4368 g, 0.8407 mmol) in distilled water (30 mL) and stirred at 50 °C for 3½ hours. The solvent was removed *in vacuo*, and iron extracted with ethyl acetate. The solid organic phase was filtered off and dried to yield dark oil (0.2008 g, 97 % mass recovery). 1H NMR (D2O, TMS, 300 MHz) revealed 0 % 6-Hydroxy-2-naphthalene-sulfonic acid sodium salt **11**, and 100 % 6,6’-dihydroxy-1,1’-binaphthalenyl-2,2’-disulfonic acid disodium salt **17**. 1H NMR spectral data was concordant with prior experiments.

Method F: Iron trichloride hexahydrate in acetonitrile

6-Hydroxy-2-naphthalene-sulfonic acid sodium salt **11** (0.1975 g, 0.8020 mmol) was added to a solution of iron trichloride hexahydrate (0.4463 g, 1.6510 mmol) in acetonitrile (30 mL) and stirred at reflux (82 °C) with nitrogen bubbling for 5 hours. The reaction mixture was filtered, the organic component taken up in water, and the solvent removed *in vacuo* to yield a brown solid (0.1141 g, 58 % mass recovery). 1H NMR (D2O, TMS, 300 MHz) revealed 100 % 6-Hydroxy-2-naphthalene-sulfonic acid sodium salt **11**, and 0 % 6,6’-dihydroxy-1,1’-binaphthalenyl-2,2’-disulfonic acid disodium salt **17**. 1H NMR spectral data was concordant with prior experiments.

Method G: Iron trichloride hexahydrate, solvent-free

6-Hydroxy-2-naphthalene-sulfonic acid sodium salt **11** (0.2015 g, 0.8180 mmol) and iron trichloride hexahydrate (0.4420 g, 1.6353 mmol) were ground together in a test-tube, sealed and kept at 50 °C for 2 hours. The reaction was quenched with ethyl acetate and filtered to yield a brown solid (0.1995 g, 99 % mass recovery). 1H NMR (DMSO-D6, TMS, 200 MHz) revealed 100 % 6-Hydroxy-2-naphthalene-sulfonic acid sodium salt **11**, and 0 % 6,6’-dihydroxy-1,1’-binaphthalenyl-2,2’-disulfonic acid disodium salt **17**. 1H NMR spectral data was concordant with prior experiments.

Method H: Iron trichloride hexahydrate in toluene

Iron trichloride hexahydrate (0.1130 g, 0.4180 mmol) was added to a suspension of 6-Hydroxy-2-naphthalene-sulfonic acid sodium salt **11** (0.0524 g, 0.2128 mmol) in toluene (4.5 mL) and slurried at 50 °C for 4 hours. The mixture was filtered, extracted with water and the aqueous solvent removed *in vacuo* to give a brown solid (0.0520g, 99 % mass recovery). 1H NMR (D2O, TMS, 300 MHz) revealed 100 % 6-Hydroxy-2-naphthalene-sulfonic acid sodium salt **11**, and 0 % 6,6’-dihydroxy-1,1’-binaphthalenyl-2,2’-disulfonic acid disodium salt **17**. 1H NMR spectral data was concordant with prior experiments.

1 R. Gupta and R. Mukherjee, *Tetrahedron Lett.*, 2000, **41**, 7763.

2 K. Ding, Y. Wang, L. Zhang, and Y. Wu, *Tetrahedron*, 1996, **52**, 1005.

3 H. O. House, N. I. Ghali, J. L. Haack, and D. VanDerveer, *J. Org. Chem.*, 1980, **45**.

4 B. M. Bhawal, S. P. Khanapure, H. Zhang, and E. R. Biehl, *J. Org. Chem.*, 1991, **56**, 2846.

5 S. L. Crump, J. Netka, and B. Rickborn, *J. Org. Chem.*, 1985, **50**, 2746.

6 C. W. Bird and Y. P. S. Chauhan, *Org. Prep. Proced. Int.*, 1980, **12**.

7 G. Domburgs, V. N. Sergeeva, and G. Zeibe, *Khimiya Drevesiny (1968-74)*, 1971, **9**, 119.

8 I. Fleming and J. Iqbal, *Synthesis*, 1982, **11**, 937.

9 Y. Takizawa, T. Munakata, Y. Iwasa, T. Suzuki, and T. Mitsuhashi, *J. Org. Chem.*, 1985, **50**, 4383.

10 M. S. Vakhitova, B. I. Pantukh, G. A. Tolstikov, O. P. Yablonskii, and R. B. Svitych, *Seriya Khimicheskaya*, 1987, **8**, 1808.

11 F. M. Dean, G. A. Herbin, D. A. Matkin, A. W. Price, and M. L. Robinson, *Journal of the Chemical Society, Perkin Transactions 1: Organic and Bio-Organic Chemistry*, 1980, **9**, 1986.
